# Supplementary material for: Do Mass Spectrometry-Derived Metabolomics Improve the Prediction of Pregnancy-Related Disorders? Findings from a UK Birth Cohort with Independent Validation
Source: MDPI journal article supplement (doi:10.3390/metabo11080530), 2021-08-10
Supplement: s1 [file s1]

## Supplementary figures

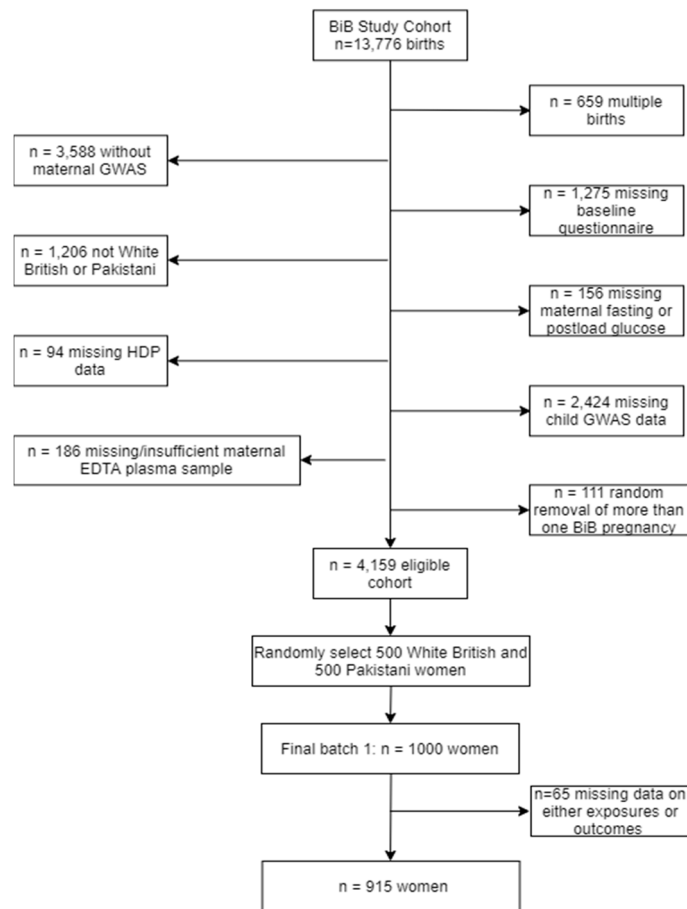

**Figure S1a:** Born in Bradford 1,000 flow of participants sample selection

**Batch 2 - 2000 women (case-cohort design)**

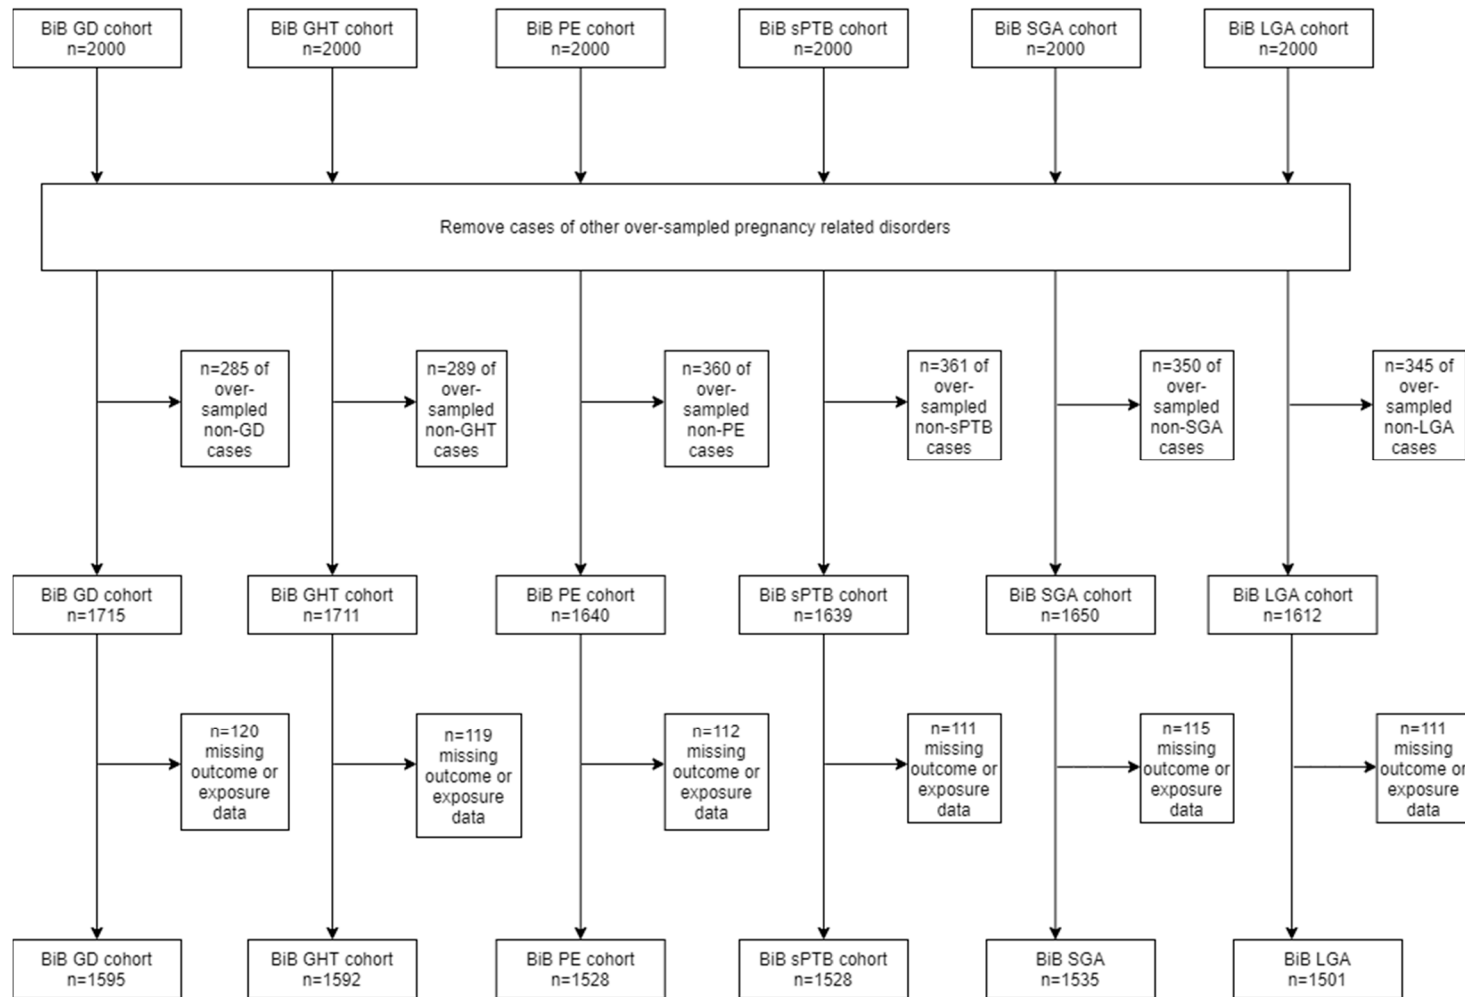

**Figure S1b:** Born in Bradford 2,000 flow of participants sample selection

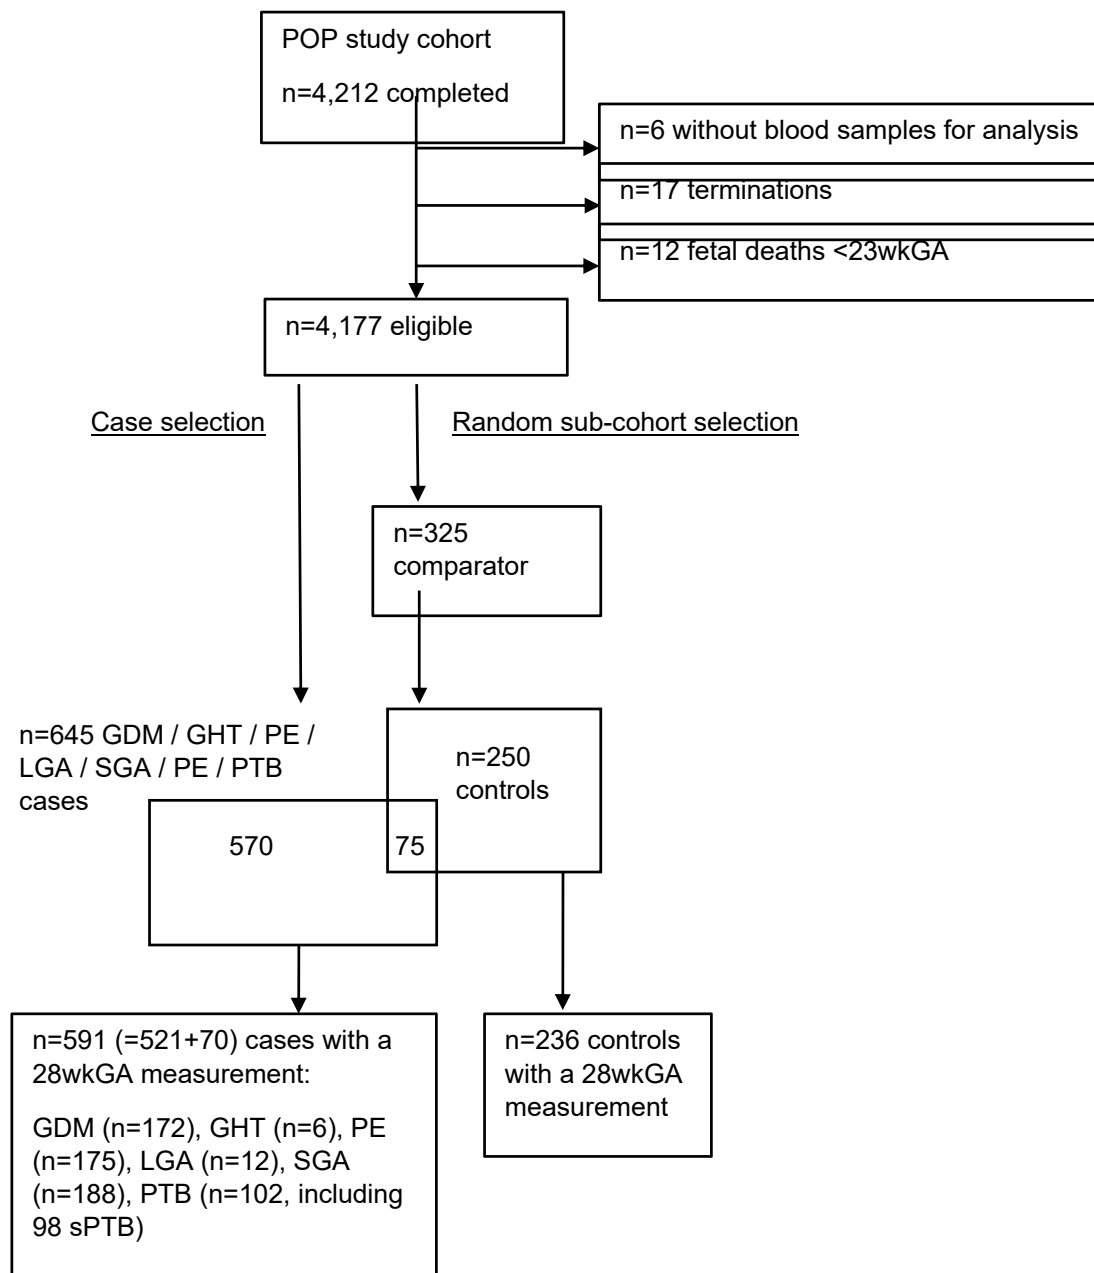

**Figure S1c:** Pregnancy Outcome Prediction study sample selection.

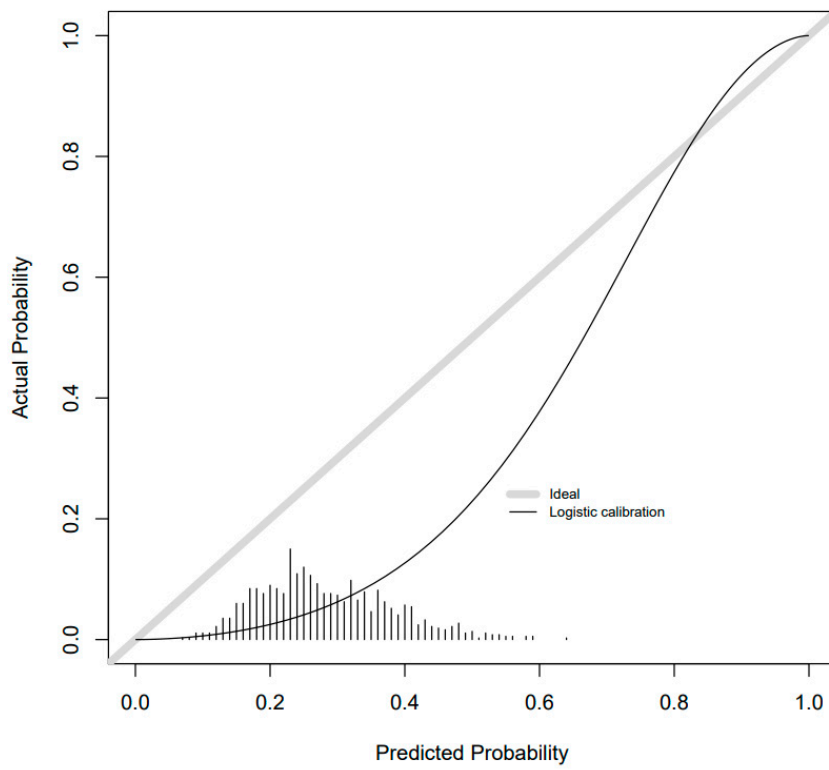

**Figure S2:** The calibration slope for the combined model of gestational hypertension prediction in the Born in Bradford 1000 cohort

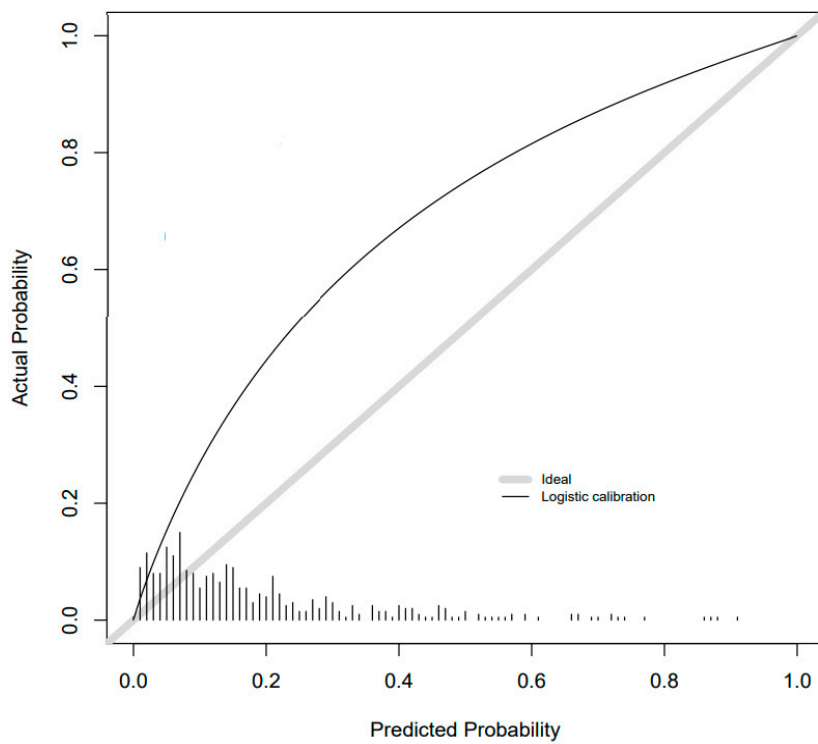

**Figure S3:** The calibration slope for the combined model of gestational diabetes prediction in the Pregnancy Outcome Prediction study

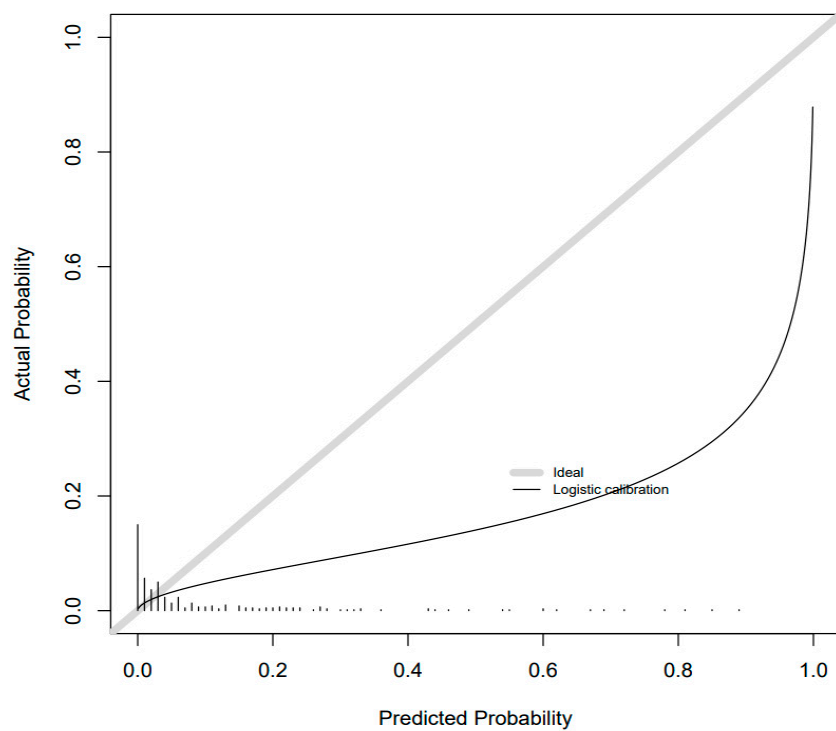

**Figure S4:** The calibration slope for the combined model of large for gestational age prediction in the Pregnancy Outcome Prediction study

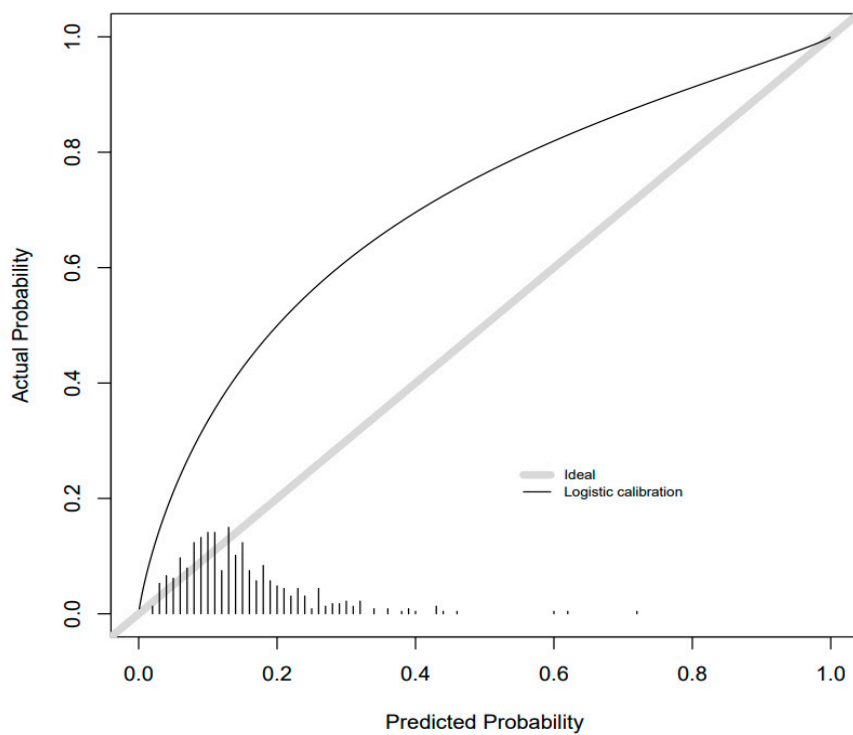

**Figure S5:** The calibration slope for the combined model of small for gestational age prediction in the Pregnancy Outcome Prediction study

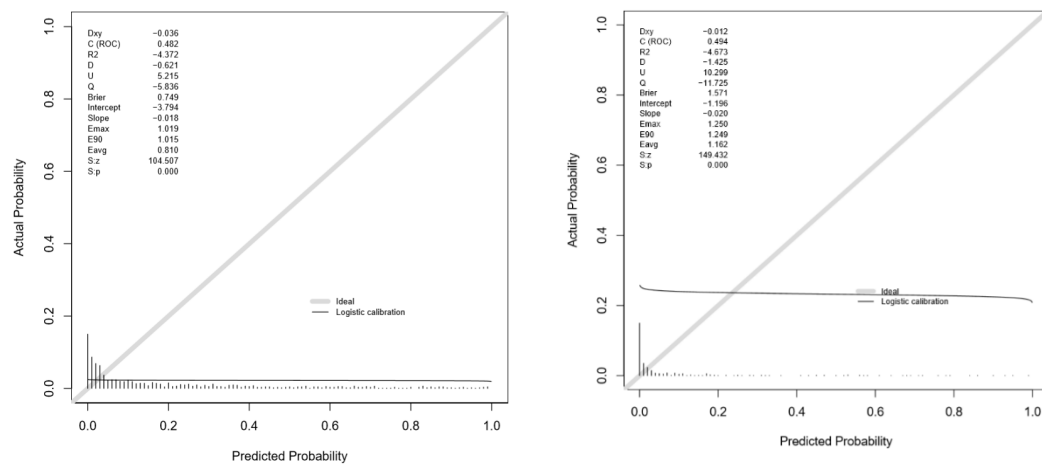

**Figure S6:** The calibration slope for the combined model of spontaneous preterm birth prediction in the Born in Bradford 1000 cohort and the Pregnancy Outcome Prediction study

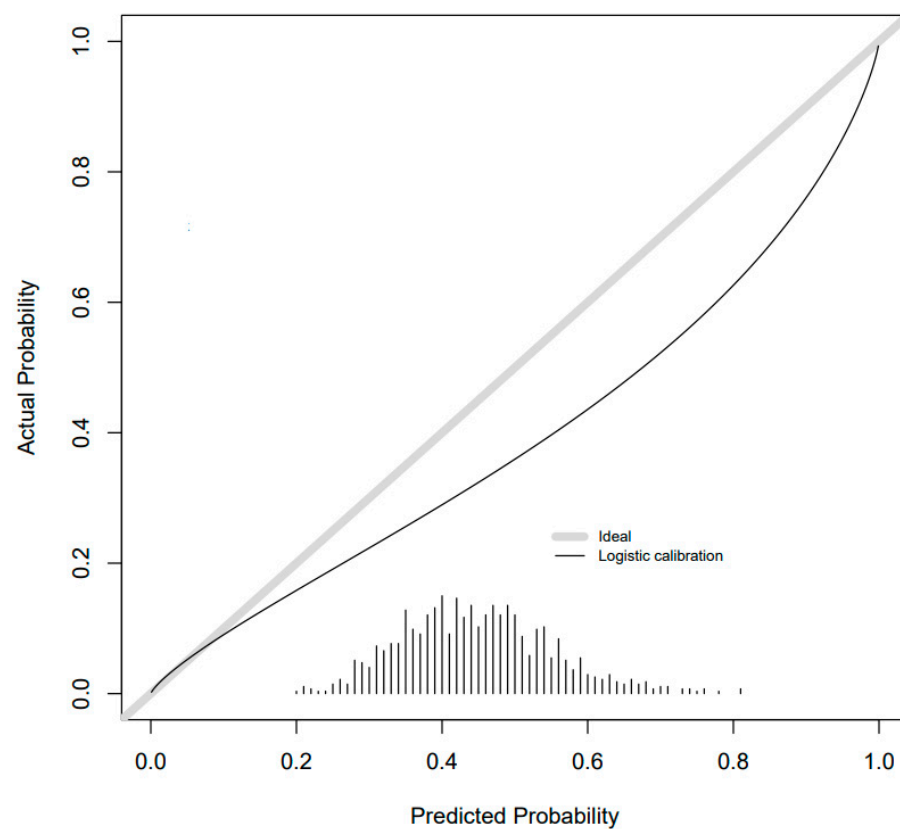

**Figure S7:** The calibration slope for the combined model of all pregnancy related disorder prediction in the Born in Bradford 1000 cohort
